# Supplementary material for: Aircraft vertical profiles during summertime regional and Saharan dust scenarios over the north-western Mediterranean basin: aerosol optical and physical properties
Source: Copernicus journal article supplement (doi:10.5194/acp-21-431-2021), 2021-01-14
Supplement: Supplementary file 1 [file acp-21-431-2021-supplement.pdf]

Supplement of Atmos. Chem. Phys., 21, 431–455, 2021  
<https://doi.org/10.5194/acp-21-431-2021-supplement>  
© Author(s) 2021. This work is distributed under  
the Creative Commons Attribution 4.0 License.

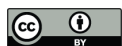

*Supplement of*

## **Aircraft vertical profiles during summertime regional and Saharan dust scenarios over the north-western Mediterranean basin: aerosol optical and physical properties**

**Jesús Yus-Díez et al.**

*Correspondence to:* Jesús Yus-Díez ([jesus.yus@idaea.csic.es](mailto:jesus.yus@idaea.csic.es)) and Marco Pandolfi ([marco.pandolfi@idaea.csic.es](mailto:marco.pandolfi@idaea.csic.es))

The copyright of individual parts of the supplement might differ from the CC BY 4.0 License.

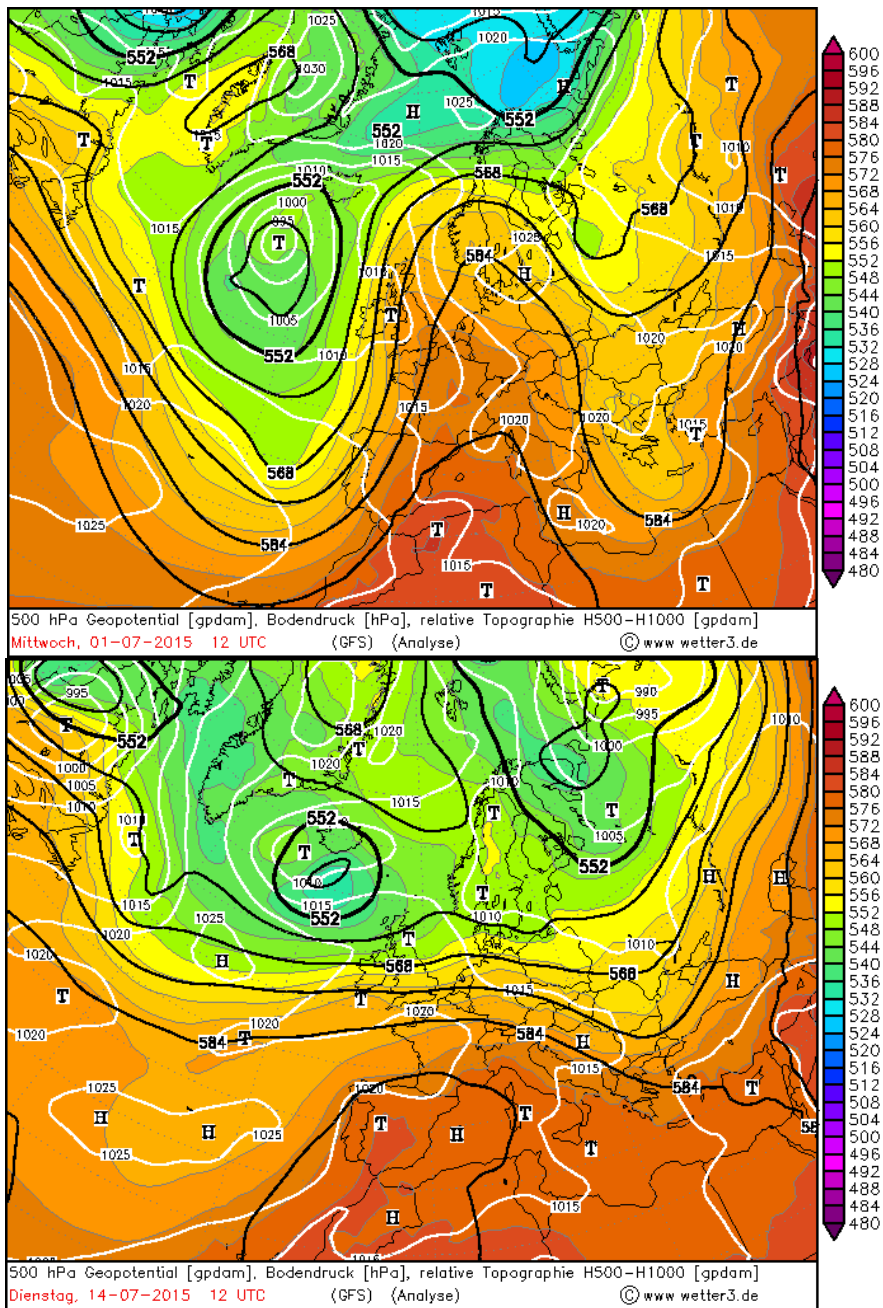

Figure S1: Synoptic meteorology with the 500 hPa Geopotential and surface pressure at 12:00 UTC for the 7th and 16th of July of 2015 as modelled by the reanalysis model ERA-INTERIM, © www.wetter3.de.

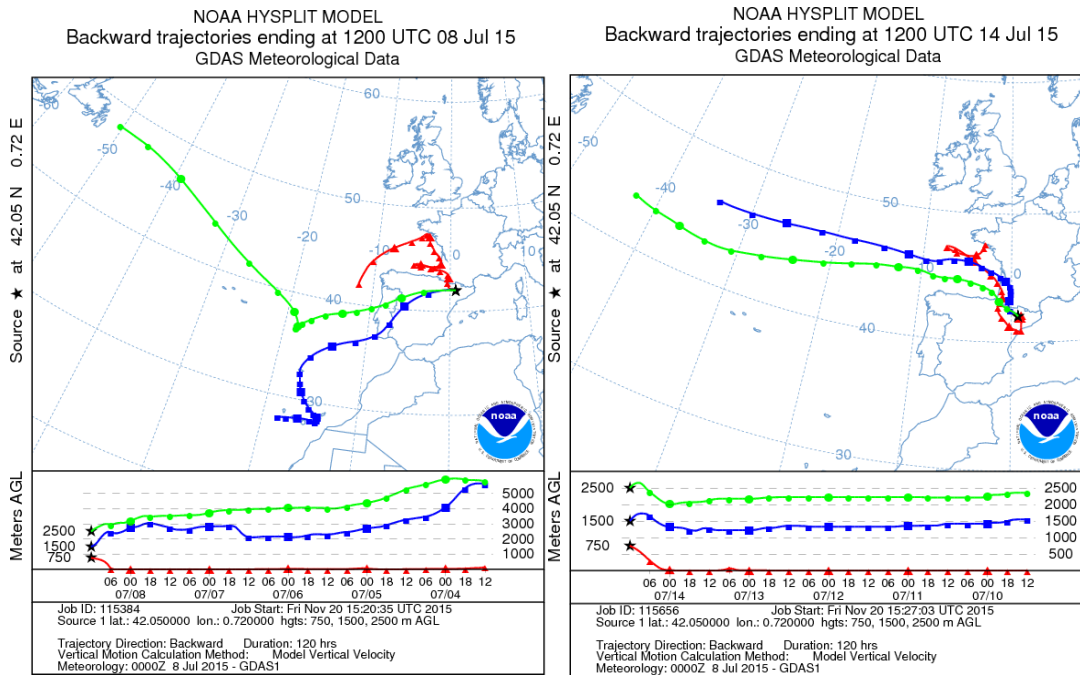

Figure S2: HYSPLIT backtrajectories for the 8th and 14th of July of 2015 at 12:00 UTC ending at MSA station.

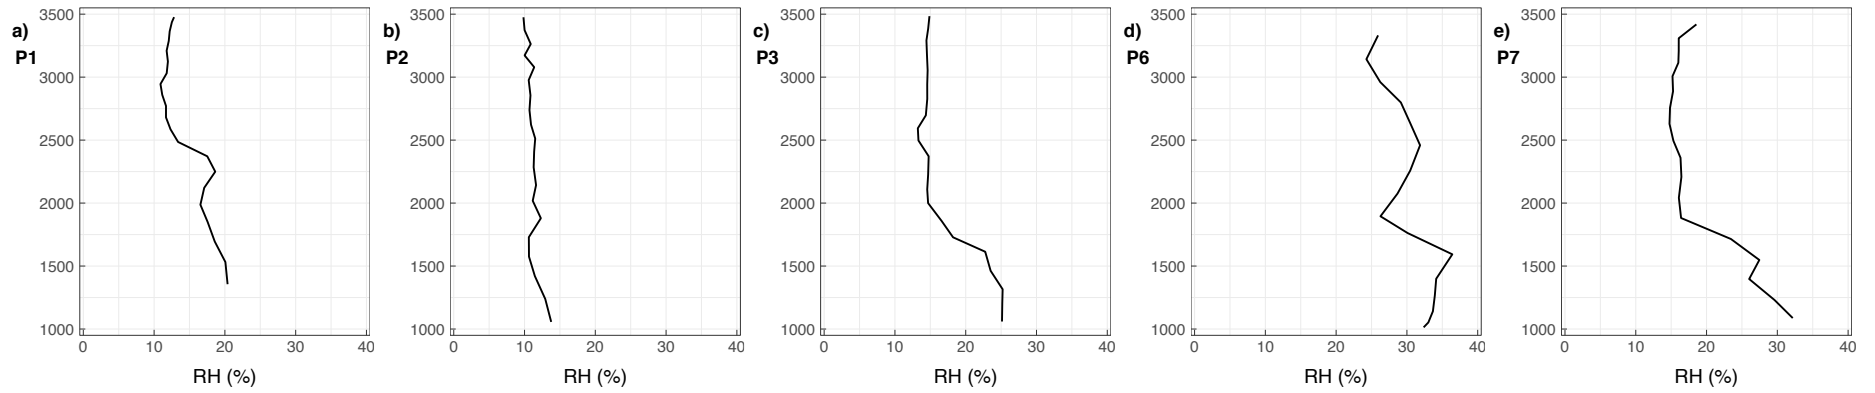

Figure S3: Vertical profiles of relative humidity (RH (%)) for a) P1, b) P2, c) P3, d) P6, and e) P7 as measured by the Kestrel unit placed in the aircraft.

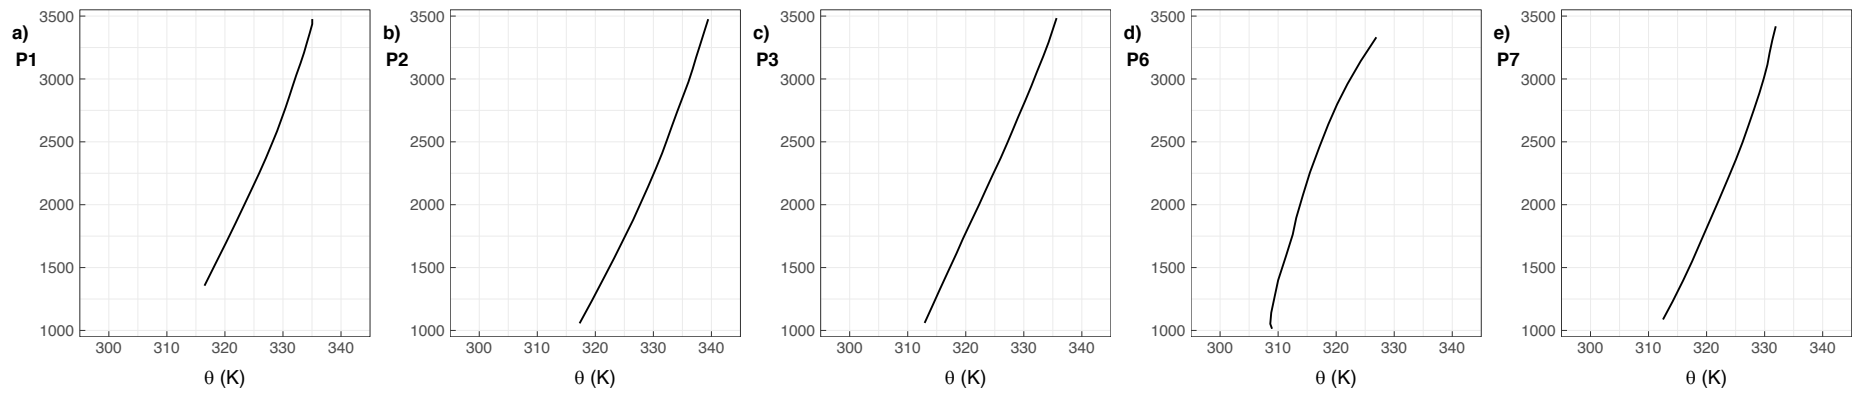

Figure S4: Vertical profiles of potential temperature ( $\theta$  (K)) for a) P1, b) P2, c) P3, d) P6, and e) P7 as measured by the Kestrel unit placed in the aircraft.

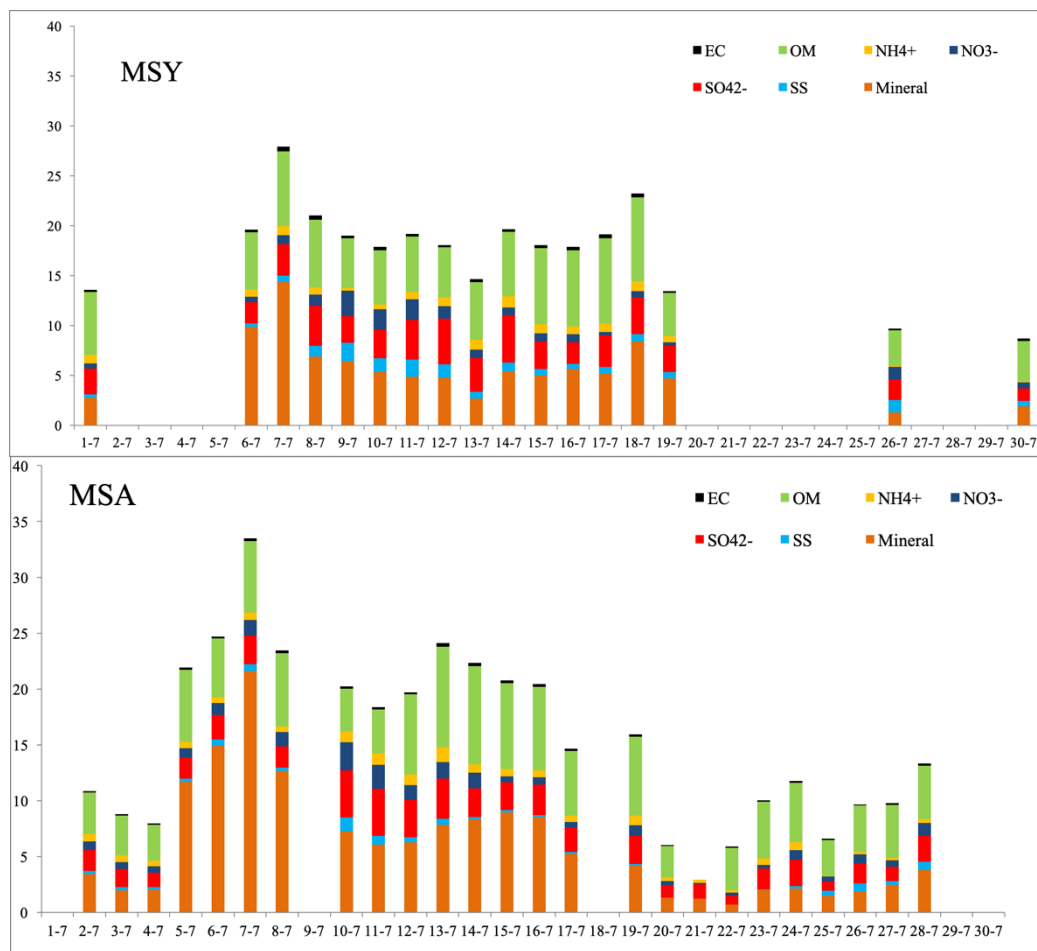

Figure S5: Daily off-line filter base chemistry analysis during the instrumented flights period of July 2015 for MSA (upper panel) and MSY (lower panel).

Table S1: Comparison between aircraft borne measurements for P1 versus the in-situ measurements of MSA station as a reference at the same time that the flight was at a height of 1500 m a.s.l. approximately.

|                         | $PM_{10}(\mu g m^{-3})$ | $PM_{2.5}(\mu g m^{-3})$ | $PM_1(\mu g m^{-3})$ | $PM_{1/10}$  | $PM_{1/2.5}$ | $\sigma_{sp\ 525\ nm}(Mm^{-1})$ | $\sigma_{ap\ 590\ nm}(Mm^{-1})$ | SAE         | AAE         | G           | SSA          |
|-------------------------|-------------------------|--------------------------|----------------------|--------------|--------------|---------------------------------|---------------------------------|-------------|-------------|-------------|--------------|
| <b>P1 – FLIGHT</b>      | <b>20.3</b>             | <b>18.38</b>             | <b>13.38</b>         | <b>0.66</b>  | <b>0.73</b>  | <b>37.85</b>                    | <b>2.59</b>                     | <b>0.93</b> | <b>1.76</b> | <b>0.59</b> | <b>0.87</b>  |
| <b>P1 – MSA IN-SITU</b> | <b>38.4</b>             | <b>20.8</b>              | <b>14.2</b>          | <b>0.37</b>  | <b>0.68</b>  | <b>41.44</b>                    | <b>3.06</b>                     | <b>0.90</b> | <b>2.12</b> | <b>0.62</b> | <b>0.86</b>  |
| <b>DIFF (%)</b>         | <b>47.1</b>             | <b>11.6</b>              | <b>5.8</b>           | <b>-78.2</b> | <b>-6.6</b>  | <b>8.7</b>                      | <b>15.36</b>                    | <b>-4.5</b> | <b>16.8</b> | <b>4.55</b> | <b>-0.22</b> |
